# Supplementary material for: Mapping Human Genetic Ancestry
Source: Oxford University Press journal article supplement (doi:10.1093/molbev/msm156), 2007-07-21
Supplement: msm156_Supplementary_Data.zip [file msm156_Supplementary_Data.zip]

Archive with 4 entries (4 files):
- mbe-07-0491-File004_msm156.pdf
- mbe-07-0491-File003_msm156.pdf
- mbe-07-0491-File005_msm156.pdf
- mbe-07-0491-File006_msm156.pdf
