# Supplementary material for: Mapping Human Genetic Ancestry
Source: Oxford University Press journal article supplement (doi:10.1093/molbev/msm156), 2007-07-21
Supplement: msm156_Supplementary_Data.zip [file msm156_Supplementary_Data.zip › mbe-07-0491-File003_msm156.pdf]

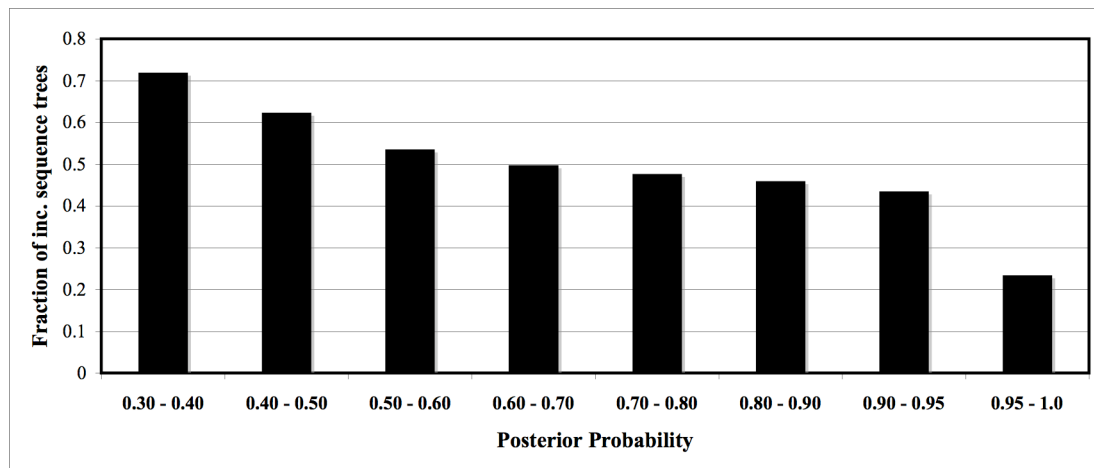

**Supplementary figure 1 Fraction of incongruent sequence trees in subsets of our data.** The fraction of incongruent sequence trees diminishes with increasing support of the maximum likelihood tree by the underlying alignment.
