# Supplementary material for: Mapping Human Genetic Ancestry
Source: Oxford University Press journal article supplement (doi:10.1093/molbev/msm156), 2007-07-21
Supplement: msm156_Supplementary_Data.zip [file msm156_Supplementary_Data.zip › mbe-07-0491-File004_msm156.pdf]

**Supplementary Table 2 Apomorphic morphological characters in support of varying human-chimpanzee-gorilla phylogenies**

|              | <b>Character</b>          | <b>Status</b>                             | <b>ID</b> |
|--------------|---------------------------|-------------------------------------------|-----------|
| <b>(H,C)</b> | Honing in males           | Further reduced                           | 48        |
|              | Pelvis: obturator groove  | deep/well defined                         | 70        |
|              | Premaxillary suture       | Obliterated in adult                      | 130       |
|              | Ankle epiphysis           | Not delayed relative to elbow             | 154       |
|              | Geniohyoideus             | insertion above inferior transverse torus | 186       |
|              | Insertion of Digastric    | Inferior transverse torus                 | 187       |
|              | Ileo-caecal valve         | Widened                                   | 210       |
|              | Cranial end of heart      | Shifted upward                            | 215       |
|              | Puberty                   | Reached at >7 years                       | 224       |
|              | Axis of earbones          | Acute angle                               | 103       |
|              | Encephalization           | High (>11)                                | 220       |
|              | Penis (erected)           | Lengthened (>80 mm)                       | 235       |
| <b>(H,G)</b> | Talus (Astragalus)        | Widened                                   | 146       |
|              | Rectum flexure            | Present                                   | 199       |
|              | Hair density on scalp     | Reduced                                   | 254       |
|              | Hair density on chest     | Very sparse                               | 256       |
|              | Angle of Manubrium Mallei | >45°                                      | 105       |
|              | Ovaries                   | Very large (>40 mm long)                  | 230       |
|              | Fluorescent F body        | Present                                   | 239       |
|              | Ear breadth               | <75% of height                            | 246       |

|              |                                    |                                         |     |
|--------------|------------------------------------|-----------------------------------------|-----|
| <b>(C,G)</b> | Metacarpal heads                   | Expanded                                | 140 |
|              | Oestrus swelling in females        | Reduced                                 | 241 |
|              | Metaconid of dP3                   | Absent                                  | 167 |
|              | Metaconid of dP4                   | Increased relative to protoconid on dP4 | 170 |
|              | Christa oblique on dP4             | Does not reach protoconid apex          | 171 |
|              | Talonid basin on dP4               | Open distally                           | 172 |
|              | Pattern 3 enamel                   | Proportion very reduced                 | 179 |
|              | Index of Palaeocortex              | Relatively enlarged (0.5-0.8)           | 221 |
|              | Ethmoid-lacrymal contact           | Shortened (40-90%)                      | A69 |
|              | Fronot-maxillary contact in orbits | Contact (30-50%)                        | A70 |

---

(H,C), (H,G) and (C,G) identify the two species exclusively sharing the apomorphic character state. Characters and the apomorphic character state are briefly described in the corresponding columns. Column 'ID' gives the character identifier used in the original publications (48-256: Shoshani et al. 1996; A69 and A70: Collar and Wood 2000).
