# Supplementary material for: Mapping Human Genetic Ancestry
Source: Oxford University Press journal article supplement (doi:10.1093/molbev/msm156), 2007-07-21
Supplement: msm156_Supplementary_Data.zip [file msm156_Supplementary_Data.zip › mbe-07-0491-File005_msm156.pdf]

**Supplementary Table 1 Genes for which at least one exon overlaps with an alignment supporting an incongruent sequence tree.**

| Ensembl Transcript ID | Refseq_ID    | Sequence Tree | Posterior Probability | Exon Type | Description                                                                  |
|-----------------------|--------------|---------------|-----------------------|-----------|------------------------------------------------------------------------------|
| ENST00000307493       | NP_443188    | (((C,G)H)O)R  | 1                     | coding    | acyl-CoA synthetase medium-chain family member 1                             |
| ENST00000326303       | NP_689544    | (((H,G)C)O)R  | 1                     | coding    | Acyl-coenzyme A thioesterase 4                                               |
| ENST00000265512       | NP_000661    | (((C,G)H)O)R  | 1                     | coding    | Alcohol dehydrogenase 4                                                      |
| ENST00000382410       | NP_697020    | (((C,G)H)O)R  | 1                     | coding    | Beta-defensin 125 precursor                                                  |
| ENST00000262717       | NP_114097    | (((H,G)C)O)R  | 1                     | coding    | Cadherin-20 precursor.                                                       |
| ENST00000324774       | NP_757363    | (((H,G)C)O)R  | 1                     | coding    | Calcium/calmodulin-dependent protein kinase kinase 2                         |
| ENST00000308191       | NP_061818    | (((H,G)C)O)R  | 1                     | coding    | cAMP-specific 3'                                                             |
| ENST00000256119       | NP_001729    | (((H,G)C)O)R  | 1                     | coding    | Carbonic anhydrase 1                                                         |
| ENST00000375908       | NP_666023    | (((C,G)H)O)R  | 1                     | coding    | Cathepsin L precursor                                                        |
| ENST00000322773       | NP_001849    | (((C,G)H)O)R  | 1                     | coding    | Collagen alpha-1(XIX) chain precursor                                        |
| ENST00000297135       | NP_006339    | (((H,G)C)O)R  | 1                     | coding    | Conserved oligomeric Golgi complex component 5                               |
| ENST00000377327       | NP_057736    | (((H,G)C)O)R  | 1                     | coding    | Crooked neck-like protein 1                                                  |
| ENST00000241312       | NP_443128    | (((H,G)C)O)R  | 1                     | coding    | CUB and sushi domain-containing protein 2                                    |
| ENST00000241312       | NP_443128    | (((C,G)H)O)R  | 1                     | coding    | CUB and sushi domain-containing protein 2                                    |
| ENST00000275016       | NP_057677    | (((C,G)H)O)R  | 1                     | coding    | Cytochrome P450 39A1                                                         |
| ENST00000367089       | NP_006510    | (((C,G)H)O)R  | 1                     | coding    | Cytoplasmic dynein light chain (T-complex testis-specific protein 1 homolog) |
| ENST00000351513       | NP_001376    | (((C,G)H)O)R  | 1                     | coding    | Dihydropyrimidinase                                                          |
| ENST00000367749       | NP_002013    | (((C,G)H)O)R  | 1                     | coding    | Dimethylaniline monooxygenase                                                |
| ENST00000340748       | NP_001370    | (((C,G)H)O)R  | 1                     | coding    | DNA (cytosine-5)-methyltransferase 1                                         |
| ENST00000255078       | NP_002171    | (((H,G)C)O)R  | 1                     | coding    | DNA-binding protein SMUBP-2                                                  |
| ENST00000261769       | NP_004351    | (((C,G)H)O)R  | 1                     | coding    | Epithelial-cadherin precursor                                                |
| ENST00000274024       | NP_000125    | (((H,G)C)O)R  | 1                     | coding    | Fatty acid-binding protein                                                   |
| ENST00000323936       | NP_001008728 | (((C,G)H)O)R  | 1                     | coding    | HMG2 like isoform 1                                                          |
| ENST00000331817       | NP_005547    | (((C,G)H)O)R  | 1                     | coding    | Keratin                                                                      |
| ENST00000361841       | NP_588608    | (((H,G)C)O)R  | 1                     | coding    | Membrane progesterin receptor beta                                           |
| ENST00000302326       | NP_002421    | (((C,G)H)O)R  | 1                     | coding    | meningioma (disrupted in balanced translocation) 1                           |
| ENST00000305432       | NP_000833    | (((C,G)H)O)R  | 1                     | coding    | Metabotropic glutamate receptor 5 precursor                                  |
| ENST00000310776       | NP_064576    | (((H,G)C)O)R  | 1                     | coding    | Mitochondrial 28S ribosomal protein                                          |
| ENST00000347778       | NP_038479    | (((C,G)H)O)R  | 1                     | coding    | Myoferlin                                                                    |
| ENST00000316877       | NP_056273    | (((C,G)H)O)R  | 1                     | coding    | Myotubularin-related protein 9                                               |
| ENST00000320704       | NP_001001968 | (((H,G)C)O)R  | 1                     | coding    | Olfactory receptor 6S1                                                       |
| ENST00000374463       |              | (((H,G)C)O)R  | 1                     | coding    | OTTHUMP00000021898 (CCP module-containing protein).                          |
| ENST00000304979       | NP_006338    | (((C,G)H)O)R  | 1                     | coding    | Peptidyl-prolyl cis-trans isomerase H                                        |

|                 |              |              |      |        |                                                                                        |
|-----------------|--------------|--------------|------|--------|----------------------------------------------------------------------------------------|
| ENST00000295887 | NP_001254    | (((H,G)C)O)R | 1    | coding | Phosphatidate<br>cytidyltransferase 1                                                  |
| ENST00000351298 | NP_002653    | (((H,G)C)O)R | 1    | coding | Phospholipase D1                                                                       |
| ENST00000299796 | NP_950251    | (((C,G)H)O)R | 1    | coding | Protein C21orf25 precursor                                                             |
| ENST00000361432 | NP_996892    | (((H,G)C)O)R | 1    | coding | Protein FAM45A                                                                         |
| ENST00000333538 | NP_071924    | (((C,G)H)O)R | 1    | coding | Putative polypeptide N-<br>acetylgalactosaminyltransferase-<br>like protein 3          |
| ENST00000381588 | NP_898864    | (((H,G)C)O)R | 1    | UTR    | RING finger protein 6                                                                  |
| ENST00000265882 | NP_057174    | (((H,G)C)O)R | 1    | coding | RNA-binding protein 7                                                                  |
| ENST00000306698 | NP_612493    | (((C,G)H)O)R | 1    | coding | Shugoshin-like 1 (hSgo1)<br>(Serologically defined breast<br>cancer antigen NY-BR-85). |
| ENST00000369503 | NP_060890    | (((C,G)H)O)R | 1    | coding | solute carrier family 22                                                               |
| ENST00000299233 | NP_666018    | (((H,G)C)O)R | 1    | coding | solute carrier family 5                                                                |
| ENST00000307378 | NP_066580    | (((H,G)C)O)R | 1    | coding | Solute carrier organic anion<br>transporter family member 1A2                          |
| ENST00000258381 | NP_536349    | (((H,G)C)O)R | 1    | coding | Sp110 nuclear body protein<br>(Speckled 110 kDa)                                       |
| ENST00000295798 | NP_003117    | (((H,G)C)O)R | 1    | coding | Spectrin alpha chain                                                                   |
| ENST00000262715 | NP_009041    | (((H,G)C)O)R | 1    | coding | Telomerase protein component<br>1                                                      |
| ENST00000313105 | NP_665802    | (((C,G)H)O)R | 1    | coding | TNF receptor-associated factor<br>6                                                    |
| ENST00000338560 | NP_057197    | (((C,G)H)O)R | 1    | coding | Transient receptor potential<br>cation channel subfamily V<br>member 2                 |
| ENST00000251272 | NP_006291    | (((H,G)C)O)R | 1    | coding | Zinc finger protein 230                                                                |
| ENST00000361959 | NP_597733    | (((C,G)H)O)R | 1    | coding | Zinc finger protein 384 (Nuclear<br>matrix transcription factor 4)                     |
| ENST00000314393 | NP_055758    | (((C,G)H)O)R | 1    | UTR    | Zinc fingers and homeoboxes<br>protein 2                                               |
| ENST00000314393 | NP_055758    | (((C,G)H)O)R | 1    | coding | Zinc fingers and homeoboxes<br>protein 2                                               |
| ENST00000343833 | NP_659419    | (((C,G)H)O)R | 1    | coding | Proline/Serine-rich coiled-coil 2                                                      |
| ENST00000310850 | NP_542395    | (((H,G)C)O)R | 1    | coding | hypothetical protein<br>LOC112487                                                      |
| ENST00000245957 | NP_056400    | (((H,G)C)O)R | 1    | coding | hypothetical protein LOC26074                                                          |
| ENST00000160713 | NP_056996    | (((H,G)C)O)R | 1    | coding | hypothetical protein LOC51059                                                          |
| ENST00000314400 | NP_056227    | (((C,G)H)O)R | 1    | coding | hypothetical protein LOC25871<br>isoform a                                             |
| ENST00000251691 | NP_065073    | (((C,G)H)O)R | 1    | coding | hypothetical protein LOC57221                                                          |
| ENST00000313159 |              | (((C,G)H)O)R | 1    | coding |                                                                                        |
| ENST00000355150 | NP_056308    | (((C,G)H)O)R | 0,99 | coding | ankyrin repeat domain 25                                                               |
| ENST00000342358 | NP_940907    | (((H,G)C)O)R | 0,99 | coding | ATPase type 13A5                                                                       |
| ENST00000256119 | NP_001729    | (((C,G)H)O)R | 0,99 | coding | Carbonic anhydrase 1(CA-I).                                                            |
| ENST00000282358 | NP_848018    | (((H,G)C)O)R | 0,99 | coding | Coiled-coil domain-containing<br>protein 50                                            |
| ENST00000337623 | NP_056423    | (((H,G)C)O)R | 0,99 | coding | erythroid differentiation-related<br>factor 1                                          |
| ENST00000248098 | NP_653171    | (((H,G)C)O)R | 0,99 | coding | Hematological and neurological<br>expressed 1-like protein                             |
| ENST00000307851 | NP_116171    | (((C,G)H)O)R | 0,99 | coding | Hepatitis A virus cellular<br>receptor 2 precursor                                     |
| ENST00000355057 | NP_003536    | (((C,G)H)O)R | 0,99 | coding | Histone H4                                                                             |
| ENST00000263087 | NP_002199    | (((C,G)H)O)R | 0,99 | coding | Integrin alpha-E precursor                                                             |
| ENST00000272000 | NP_001005736 | (((C,G)H)O)R | 0,99 | coding | Lysosomal trafficking regulator                                                        |
| ENST00000339200 | NP_003675    | (((H,G)C)O)R | 0,99 | coding | MAP kinase-interacting<br>serine/threonine-protein kinase<br>1                         |

|                 |              |              |      |        |                                                                               |
|-----------------|--------------|--------------|------|--------|-------------------------------------------------------------------------------|
| ENST00000340694 |              | (((H,G)C)O)R | 0,99 | coding | Neurabin-1 (Neural tissue-specific F-actin binding protein I)                 |
| ENST00000360409 | NP_957716    | (((C,G)H)O)R | 0,99 | coding | Neuropilin-2 precursor                                                        |
| ENST00000369682 | NP_059984    | (((C,G)H)O)R | 0,99 | coding | Plexin-A3 precursor (Plexin-4)                                                |
| ENST00000262477 | NP_004694    | (((H,G)C)O)R | 0,99 | coding | Rab GTPase-binding effector protein 1                                         |
| ENST00000237305 | NP_005618    | (((C,G)H)O)R | 0,99 | coding | Serine/threonine-protein kinase Sgk1                                          |
| ENST00000360456 | NP_066287    | (((H,G)C)O)R | 0,99 | coding | Sodium channel protein type 2 alpha subunit                                   |
| ENST00000284322 | NP_056244    | (((C,G)H)O)R | 0,99 | coding | Target of Nesh-SH3 precursor                                                  |
| ENST00000281523 | NP_078973    | (((C,G)H)O)R | 0,99 | coding | Zinc finger protein 659                                                       |
| ENST00000309050 | NP_997318    | (((H,G)C)O)R | 0,99 | coding | hypothetical protein LOC400073                                                |
| ENST00000193403 | NP_001093    | (((H,G)C)O)R | 0,98 | coding | Alpha-actinin-1                                                               |
| ENST00000237612 | NP_004818    | (((C,G)H)O)R | 0,98 | coding | ATP-binding cassette sub-family G member 2 (Breast cancer resistance protein) |
| ENST00000360606 | NP_065928    | (((C,G)H)O)R | 0,98 | coding | dynein heavy chain domain 3                                                   |
| ENST00000324138 | NP_001018123 | (((C,G)H)O)R | 0,98 | coding | Fanconi anemia group B protein                                                |
| ENST00000261887 | NP_003913    | (((H,G)C)O)R | 0,98 | coding | guanine nucleotide exchange factor p532                                       |
| ENST00000380206 | NP_000596    | (((H,G)C)O)R | 0,98 | coding | Interferon alpha-2 precursor                                                  |
| ENST00000328496 | NP_001010891 | (((H,G)C)O)R | 0,98 | coding | metaxin 3                                                                     |
| ENST00000341919 | NP_005588    | (((H,G)C)O)R | 0,98 | coding | Nuclear factor 1 C-type                                                       |
| ENST00000228495 | NP_114160    | (((C,G)H)O)R | 0,98 | coding | potassium channel tetramerisation domain containing 10                        |
| ENST00000298925 | NP_006148    | (((H,G)C)O)R | 0,98 | coding | Protein kinase C-binding protein NELL1 precursor                              |
| ENST00000336735 | NP_005056    | (((C,G)H)O)R | 0,98 | coding | Sel-1 homolog precursor                                                       |
| ENST00000286827 | NP_003244    | (((H,G)C)O)R | 0,98 | coding | T-lymphoma invasion and metastasis-inducing protein 1                         |
| ENST00000236709 | NP_057245    | (((C,G)H)O)R | 0,97 | coding | Alpha-1,4-N-acetylglucosaminyltransferase                                     |
| ENST00000325551 | NP_003789    | (((H,G)C)O)R | 0,97 | coding | Alpha-catulin                                                                 |
| ENST00000376427 | NP_777598    | (((C,G)H)O)R | 0,97 | coding | FERM domain containing 3                                                      |
| ENST00000230990 | NP_001936    | (((H,G)C)O)R | 0,97 | coding | Heparin-binding EGF-like growth factor precursor                              |
| ENST00000328939 | NP_055407    | (((H,G)C)O)R | 0,97 | coding | Kv channel-interacting protein 1                                              |
| ENST00000341893 | NP_078824    | (((C,G)H)O)R | 0,97 | coding | leucine-rich repeats and IQ motif containing 2                                |
| ENST00000361649 | NP_000433    | (((H,G)C)O)R | 0,97 | coding | Platelet endothelial cell adhesion molecule precursor                         |
| ENST00000302078 | NP_002660    | (((C,G)H)O)R | 0,97 | coding | Pleiotropic regulator 1                                                       |
| ENST00000366769 | NP_003598    | (((C,G)H)O)R | 0,97 | coding | Serine/threonine-protein kinase MRCK alpha                                    |
| ENST00000278616 | NP_000042    | (((H,G)C)O)R | 0,97 | coding | Serine-protein kinase ATM                                                     |
| ENST00000322940 | NP_060302    | (((H,G)C)O)R | 0,97 | coding | hypothetical protein LOC54942                                                 |
| ENST00000335012 | NP_001020437 | (((C,G)H)O)R | 0,97 | coding | hypothetical protein LOC285382                                                |
| ENST00000261842 | NP_031373    | (((C,G)H)O)R | 0,96 | coding | AP-4 complex subunit epsilon-1                                                |
| ENST00000346717 | NP_005010    | (((C,G)H)O)R | 0,96 | coding | Calcium/calmodulin-dependent 3'                                               |
| ENST00000375908 | NP_666023    | (((C,G)H)O)R | 0,96 | coding | Cathepsin L precursor                                                         |
| ENST00000262625 | NP_954649    | (((H,G)C)O)R | 0,96 | coding | Kin of IRRE-like protein 2 precursor                                          |
| ENST00000381482 | NP_543026    | (((H,G)C)O)R | 0,96 | coding | Serine/threonine-protein kinase 35                                            |

|                 |           |                      |      |        |                                                                  |
|-----------------|-----------|----------------------|------|--------|------------------------------------------------------------------|
| ENST00000375451 | NP_848561 | <b>(((H,G)C)O)R)</b> | 0,96 | coding | Short palate                                                     |
| ENST00000271359 | NP_000687 | <b>(((C,G)H)O)R)</b> | 0,95 | coding | 4-trimethylaminobutyraldehyde dehydrogenase                      |
| ENST00000367492 | NP_114141 | <b>(((C,G)H)O)R)</b> | 0,95 | coding | Hemicentin-1 precursor (Fibulin-6)                               |
| ENST00000302085 | NP_005891 | <b>(((C,G)H)O)R)</b> | 0,95 | coding | Mothers against decapentaplegic homolog 1 (SMAD 1)               |
| ENST00000226207 | NP_005954 | <b>(((H,G)C)O)R)</b> | 0,95 | coding | Myosin-1                                                         |
| ENST00000313478 | NP_060142 | <b>(((H,G)C)O)R)</b> | 0,95 | coding | Transient receptor potential cation channel subfamily M member 7 |
| ENST00000372771 | NP_036553 | <b>(((H,G)C)O)R)</b> | 0,95 | coding | Zinc finger protein Rlf                                          |
| ENST00000262996 | NP_055945 | <b>(((H,G)C)O)R)</b> | 0,95 | coding | TBC1 domain family, member 9                                     |

---
