# Supplementary material for: Mapping Human Genetic Ancestry
Source: Oxford University Press journal article supplement (doi:10.1093/molbev/msm156), 2007-07-21
Supplement: msm156_Supplementary_Data.zip [file msm156_Supplementary_Data.zip › mbe-07-0491-File006_msm156.pdf]

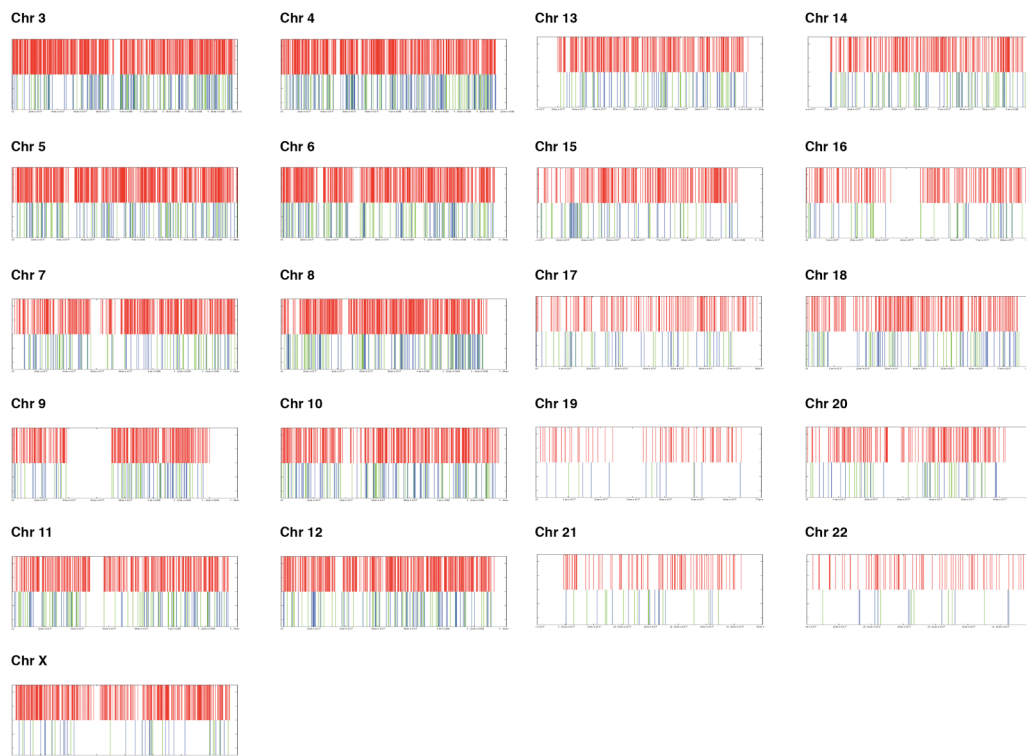

**Supplementary figure 2 Distribution of resolved sequence trees along human chromosomes 3 to X.** (H,C)G are represented in red, (H,G)C trees in blue and (C,G)H trees in green.
